# Supplementary material
Source: Springer Nature journal article supplement (https://www.springermedizin.de/resource/supplementary/12913_2006_583_MOESM4_ESM.pdf/9535388)

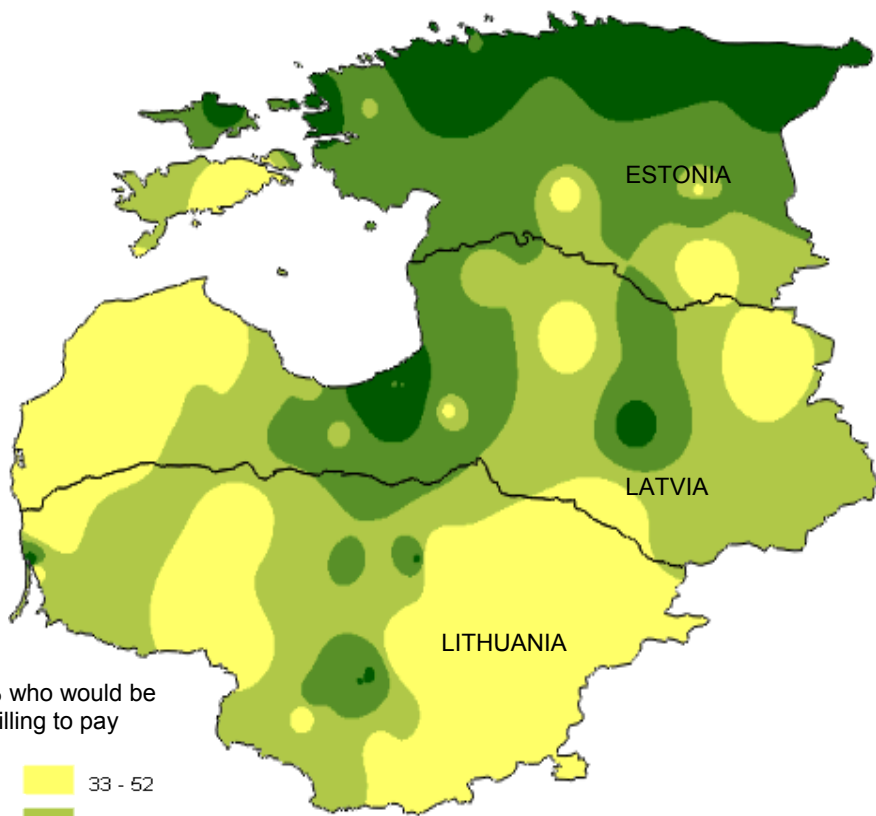

% who would be willing to pay

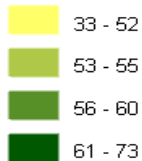

Supplement: MOESM4 [file 9535388]
